# Supplementary material for: Tailoring the ternary synergistic effect of TBAH/H 2 O/DMSO for room-temperature, ultrafast cellulose dissolution
Source: Royal Society of Chemistry journal article supplement (doi:10.1039/d5gc06045a), 2026-01-01
Supplement: d5gc06045a2.pdf [file d5gc06045a2.pdf]

Electronic supplementary information

**Tailoring the ternary synergistic effect of TBAH/H<sub>2</sub>O/DMSO for  
room-temperature and ultrafast cellulose dissolution**

Jianan Zhu <sup>a</sup>, Hao Sun <sup>a,\*</sup>, Jianrong Mao <sup>a</sup>, Yuan Zou <sup>a</sup>, Fulin Yang <sup>a</sup>, Yunwu Zheng <sup>a</sup>, Can Liu <sup>a</sup>, Xu Lin <sup>a</sup>, Defa Hou <sup>a,\*</sup>, Mingbo Yang <sup>b\*</sup>

*a National Joint Engineering Research Center for Highly-Efficient Utilization Technology of Forestry Resource, Yunnan Provincial Key Laboratory of Wood and Bamboo Biomass Materials, Southwest Forestry University, Kunming 650224, P. R. China*

*b College of Polymer Science and Engineering, Sichuan University, Chengdu 610065, P. R. China*

*\* To whom correspondence should be addressed. Email: yangmb@scu.edu.cn (Mingbo Yang), houdefa001@163.com (Defa Hou), and sunhao@swfu.edu.cn (Hao Sun).*

# Contents

|                                                                                                |     |
|------------------------------------------------------------------------------------------------|-----|
| 1. Supplementary experimental section .....                                                    | S3  |
| 1.1 Preparation of TBAH/DMSO solution.....                                                     | S3  |
| 1.2 Detailed procedures for determining Kamlet-Taft (K-T) parameters.....                      | S3  |
| 1.3 Density functional theory (DFT) calculation .....                                          | S4  |
| 1.4 Molecular dynamics simulation (MD) .....                                                   | S5  |
| 2 Dissolution of cellulose in TBAH/H <sub>2</sub> O/DMSO solvents .....                        | S7  |
| 2.1 Effect of TBAH/H <sub>2</sub> O/DMSO dissolution on the crystalline structure of MCC ..... | S7  |
| 2.2 Chemical structures of MCC and the corresponding regenerated cellulose.....                | S7  |
| 2.3 Solubility of MCC in TBAH/H <sub>2</sub> O and TBAH/H <sub>2</sub> O/DMSO solvents .....   | S8  |
| 2.4 Dissolution of various cellulose in TBAH/H <sub>2</sub> O/DMSO solvent.....                | S12 |
| 2.5 Comparison of TBAH/H <sub>2</sub> O/DMSO with conventional cellulose solvents .....        | S15 |
| 3 Conductivity of various TBAH solution .....                                                  | S17 |
| 3.1 Conductivity of TBAH/DMSO solutions.....                                                   | S17 |
| 3.2 Conductivity of TBAH aqueous solution.....                                                 | S17 |
| 4. Characterization of the interaction among TBAH, H <sub>2</sub> O, DMSO, and cellulose ..... | S18 |
| 4.1 NMR spectra of cellobiose in different solvents.....                                       | S18 |
| 4.2 NMR spectra of cellulose in different solvents.....                                        | S18 |
| 5. Computer simulation of cellulose dissolved in TBAH/H <sub>2</sub> O/DMSO.....               | S19 |
| 6. Fabrication and properties of the regenerated cellulose.....                                | S21 |
| 6.1 Storage stability of cellulose solution .....                                              | S21 |
| 6.1 Thermal stability of the regenerated cellulose .....                                       | S21 |
| 6.2 Mechanical performance of the regenerated cellulose.....                                   | S22 |
| REFERENCES .....                                                                               | S23 |

## 1. Supplementary experimental section

### 1.1 Preparation of TBAH/DMSO solution

To obtain TBAH/DMSO solution (50/50, w/w) without water (or with a slight amount of water), 100.0 g TBAH solution (40 wt.% in methanol, Adamas) was dissolved into 40.0 g DMSO (Safedry, Water  $\leq$  50 ppm, 99.7%, Adamas). Then, the transparent TBAH/methanol/DMSO solution was subjected to removing methanol by rotary evaporation (40 °C, > 8 h). The obtained TBAH/DMSO solution (50/50, w/w) was stored in sealed reagent bottles containing molecular sieves 4A (balls with diameters of 3 ~ 5 mm, Greagent). On the other hand, according to the reported method <sup>1</sup>, TBAH was obtained by drying the TBAH solution (40 wt.% in methanol, Adamas) through rotary evaporation (40 °C, > 8 h). After that, designated TBAH was dissolved into DMSO (Safedry, Water  $\leq$  50 ppm, 99.7%, Adamas) at room temperature to achieve a TBAH/DMSO solution (50/50 w/w).

### 1.2 Detailed procedures for determining Kamlet-Taft (K-T) parameters

The Kamlet-Taft (K-T) parameters of TBAH/H<sub>2</sub>O/DMSO solvents were determined using Reichardt's dye (RD,  $M_w$  = 551.68 g/mol), 4-nitroaniline (NA,  $M_w$  = 138.12 g/mol), and *N*, *N*-diethyl-4-nitroaniline (DNA,  $M_w$  = 178.24 g/mol) as molecular probes <sup>2-4</sup>. Initially, NA, DNA, and RD were uniformly dissolved in methanol with concentrations of 3 mg/mL, 3 mg/mL, and 7 mg/mL, respectively. Subsequently, the dye solutions were transferred into 5 mL centrifuge tubes and dried in a vacuum oven at 40 °C for 48 h to remove methanol. After that, 3 mL of TBAH/H<sub>2</sub>O/DMSO was added to the dried dyes, and the mixture was stirred until the dyes dissolved completely. Then, the dyed TBAH/H<sub>2</sub>O/DMSO solvent was transferred into a quartz cuvette (1 cm  $\times$  1 cm), and its absorption spectrum was measured at room temperature (25 °C) using a UV-Vis spectrophotometer (UV-3600i Plus, Shimadzu). Notably, the maximum

absorbance of the absorption spectrum was controlled in the range of 0.4 to 2.0 by varying the concentration of dyes in the dyed TBAH/H<sub>2</sub>O/DMSO. Finally, the hydrogen bond acidity ( $\alpha$ ), hydrogen bond basicity ( $\beta$ ), and polarizability ( $\pi^*$ ) values of TBAH/H<sub>2</sub>O/DMSO were calculated based on the measured results.

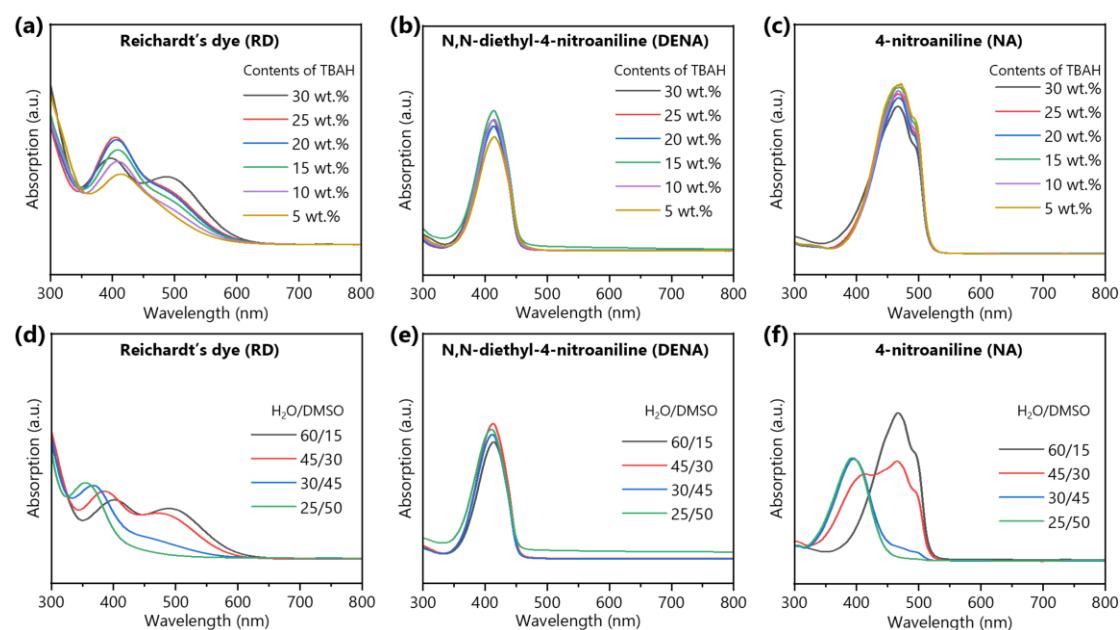

**Figure S1** UV-Vis absorption spectra of various TBAH/H<sub>2</sub>O/DMSO solvents dyed by molecular probes. (a-c) TBAH/H<sub>2</sub>O/DMSO solvents with different TBAH concentrations (TBAH/H<sub>2</sub>O = 1/1, w/w) that dyed by RD (a), DENA (b), and NA (c), respectively; (d-f) TBAH/H<sub>2</sub>O/DMSO solvents with different concentrations of TBAH/H<sub>2</sub>O (the concentration of TBAH was 25 wt.%) that dyed by RD (d), DENA (e), and NA (f), respectively.

### 1.3 Density functional theory (DFT) calculation

All DFT calculations were carried out using Gaussian 16 at the B3LYP/6-31G(d) level, including Grimme's D3(BJ) dispersion correction<sup>5-8</sup>. The gas-phase geometry optimizations and frequency analyses were performed to ensure that each stationary point corresponds to an actual minimum (no imaginary frequencies). Thermochemical parameters (enthalpy, entropy, and Gibbs free energy) were derived at 298.15 K and 1 bar using standard statistical thermodynamics. Based on wavefunctions obtained from

Gaussian 16 output files, the electrostatic potential (ESP) maps, van der Waals (vdW) maps, and reduced density gradient (RDG) isosurfaces of all samples (cellulose chain segment, TBAH, H<sub>2</sub>O, and DMSO) were generated using Multiwfn 3.8(dev)<sup>9–11</sup>. Furthermore, the calculation results were visualized with VMD 1.9.3<sup>12</sup>. Notably, the noncovalent interactions in different systems were identified via the  $\text{sign}(\lambda_2)\rho$  criterion.

## 1.4 Molecular dynamics simulation (MD)

Molecular dynamics (MD) simulations were performed with CP2K/Quickstep in the Gaussian–plane-wave (GPW) scheme (Born–Oppenheimer) under three-dimensional periodic boundary conditions<sup>13</sup>. Two cellulose oligomer chains (DP = 4) were solvated in an explicit TBAH/H<sub>2</sub>O/DMSO solvent. Long-range electrostatics and boundary handling were treated with the periodic Poisson solver. The simulation boxes are summarized in Table S1 by lattice parameters ( $a$ ,  $b$ ,  $c$ ,  $\alpha$ ,  $\beta$ , and  $\gamma$ ) and volume.

**Table S1** Detailed unit-cell parameters and volume of cellulose.

| Stage                        | $a$ (Å) | $b$ (Å) | $c$ (Å) | $\alpha$ (°) | $\beta$ (°) | $\gamma$ (°) | Volume (Å <sup>3</sup> ) |
|------------------------------|---------|---------|---------|--------------|-------------|--------------|--------------------------|
| Pre-MD                       |         |         |         |              |             |              |                          |
| orthorhombic<br>(opt)        | 28.54   | 28.60   | 29.62   | 90           | 90          | 90           | 24183                    |
| MD triclinic<br>(production) | 28.44   | 27.84   | 29.55   | 88.89        | 87.81       | 87.80        | 23358                    |

Electronic structure was described using the PBE exchange–correlation functional with Grimme D3(BJ) dispersion, Goedecker–Teter–Hutter (GTH-PBE) pseudopotentials, and DZVP-MOLOPT-SR-GTH basis sets for all elements<sup>14–17</sup>. The auxiliary plane-wave density expansion employed cut-offs of CUTOFF = 500 Ry and REL\_CUTOFF = 50 Ry. Self-consistent optimization used the orbital-transformation scheme with a DIIS minimizer. The SCF convergence threshold was set to EPS\_SCF =  $1.0 \times 10^{-6}$ , with up to 20 outer iterations per MD step. Wavefunctions were extrapolated with the

always-stable predictor–corrector (ASPC) method (order 3). Spin polarization was not employed.

Prior to dynamics, variable-cell geometry optimization was carried out at 1 bar using analytical stress evaluation (DIRECT\_CELL\_OPT). This procedure relaxed both the atomic positions and the lattice vectors. Production trajectories were obtained following a two-stage protocol: (i) canonical (NVT) dynamics was performed at 298.15 K for 2 000 steps with a time step of  $\Delta t = 1.0$  fs, in which the temperature was controlled by the canonical sampling through velocity rescaling thermostat (CSVR;  $\tau_t = 200$  fs); (ii) isothermal–isobaric dynamics with an isotropic barostat (NPT\_I) was performed at 298.15 K and 1 bar for 6000 steps using the same CSVR thermostat ( $\tau_t = 200$  fs) with a barostat time constant of  $\tau_p = 1\,000$  fs. Atomic coordinates were written at every MD step in DCD format, and restart files (coordinates, velocities and CP2K restart records) were synchronized with the trajectory output to enable seamless continuation. The post-processing of trajectory was carried out using GROMACS 2020 and visualized in VMD 1.9.3<sup>18, 19</sup>.

## 2 Dissolution of cellulose in TBAH/H<sub>2</sub>O/DMSO solvents

### 2.1 Effect of TBAH/H<sub>2</sub>O/DMSO dissolution on the crystalline structure of MCC

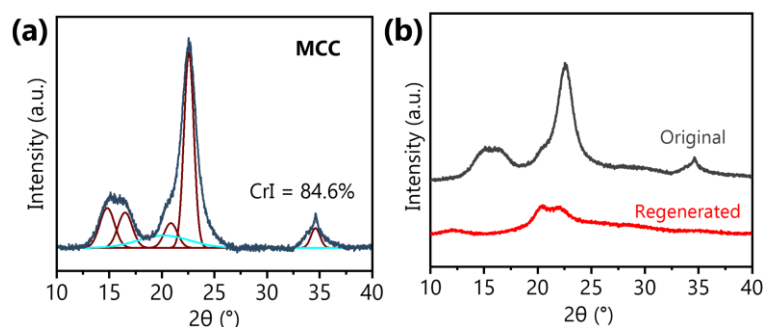

**Figure S2** XRD patterns of MCC and the corresponding regenerated cellulose.

According to the XRD patterns of MCC and the corresponding regenerated cellulose, it was found that MCC with cellulose I ( $2\theta = 15.1^\circ$ ,  $16.3^\circ$ , and  $22.4^\circ$ ) crystals was transformed into cellulose II crystals ( $2\theta = 20 - 22^\circ$ ) after TBAH/H<sub>2</sub>O/DMSO dissolution<sup>20</sup>. This result suggested the complete dissolution of MCC in TBAH/H<sub>2</sub>O/DMSO solvent.

### 2.2 Chemical structures of MCC and the corresponding regenerated cellulose

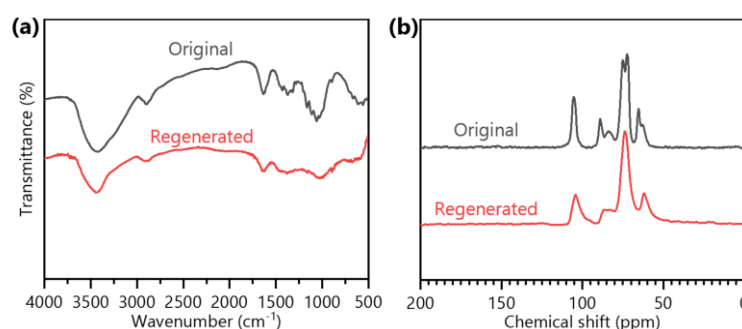

**Figure S3** FT-IR (a) and solid-state <sup>13</sup>C CP/MAS NMR (b) spectra of MCC and the corresponding regenerated cellulose.

As shown in Figure S3, MCC and the corresponding regenerated cellulose showed

similar FT-IR and  $^{13}\text{C}$  NMR spectra, suggesting their similar chemical structure. Moreover, in the FT-IR spectra of MCC and the corresponding regenerated cellulose, similar O–H bonds ( $3380\text{--}3470\text{ cm}^{-1}$ ) and C–H bonds ( $2897\text{ cm}^{-1}$ ) absorption was observed. Meanwhile, compared with MCC, the bending absorption of C–H bonds ( $1367\text{ cm}^{-1}$ ) was weakened in the FT-IR spectrum of the regenerated cellulose, indicating partial loss of  $\text{O}_6\text{--H}\cdots\text{O}_3$  hydrogen bonds. Besides, in the FT-IR spectrum of the regenerated cellulose, a blue shift and a reduced intensity of O–H bonds characteristic absorption were detected, suggesting the crystallinity of cellulose decrease <sup>21</sup>. A similar result was also found in CP/MAS $^{13}\text{C}$  NMR characterization, evident downfield shifts of C4 and C6 (89 ppm to 82 ppm and 65 ppm to 61 ppm) were observed, confirming the conversion of cellulose I into cellulose II <sup>22</sup>. Thus, the FT-IR and  $^{13}\text{C}$  NMR analysis also confirmed the complete dissolution of MCC in TBAH/ $\text{H}_2\text{O}$ /DMSO solvent.

### 2.3 Solubility of MCC in TBAH/ $\text{H}_2\text{O}$ and TBAH/ $\text{H}_2\text{O}$ /DMSO solvents

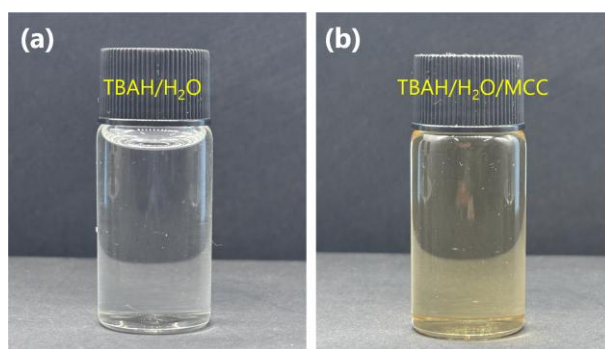

**Figure S4** Digital images of TBAH/ $\text{H}_2\text{O}$  (50/50, w/w) solution (a) and TBAH/ $\text{H}_2\text{O}$ /MCC (50/50/4, w/w/w) solution (b).

---



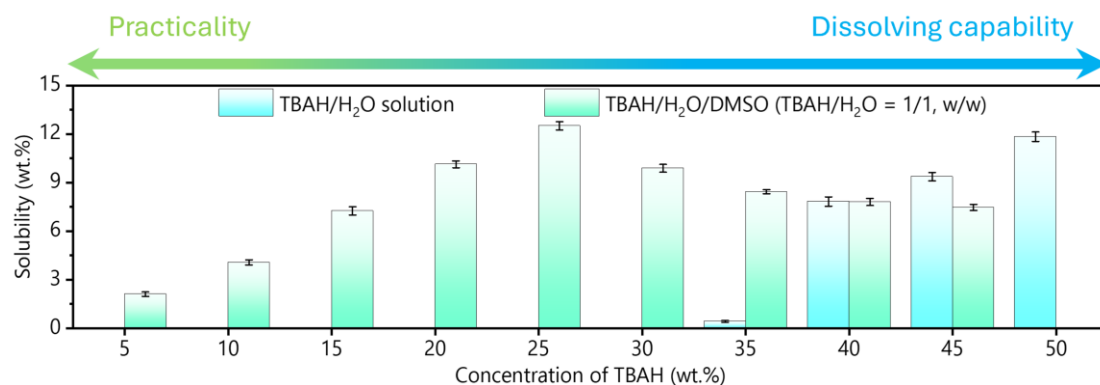

**Figure S5** Solubility of MCC in TBAH/H<sub>2</sub>O and TBAH/H<sub>2</sub>O/DMSO (TBAH/H<sub>2</sub>O = 1/1, w/w) with different TBAH concentration via a one-step strategy.

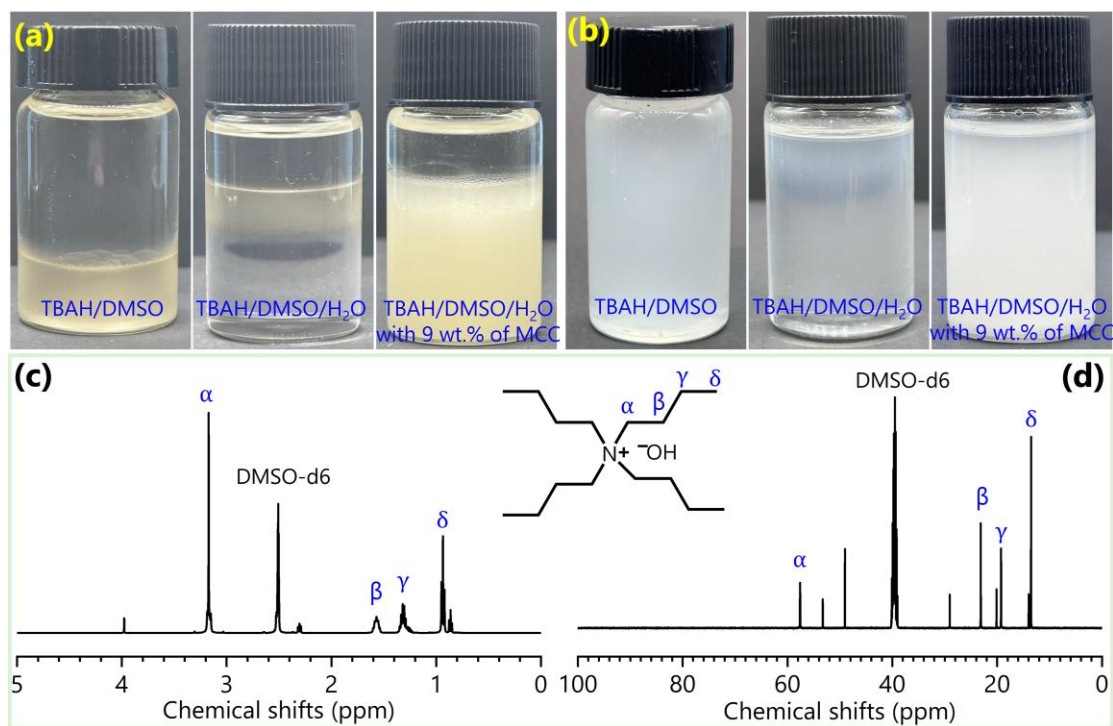

**Figure S6** Preparation and characterization of TBAH. (a, b) Digital images of TBAH/DMSO (25/75, w/w) solution obtained by evaporating TBAH/H<sub>2</sub>O solution (a) and TBAH/methanol/DMSO solution (b); <sup>1</sup>H NMR (c) and <sup>13</sup>C NMR (d) of TBAH obtained by evaporating TBAH/H<sub>2</sub>O solution.

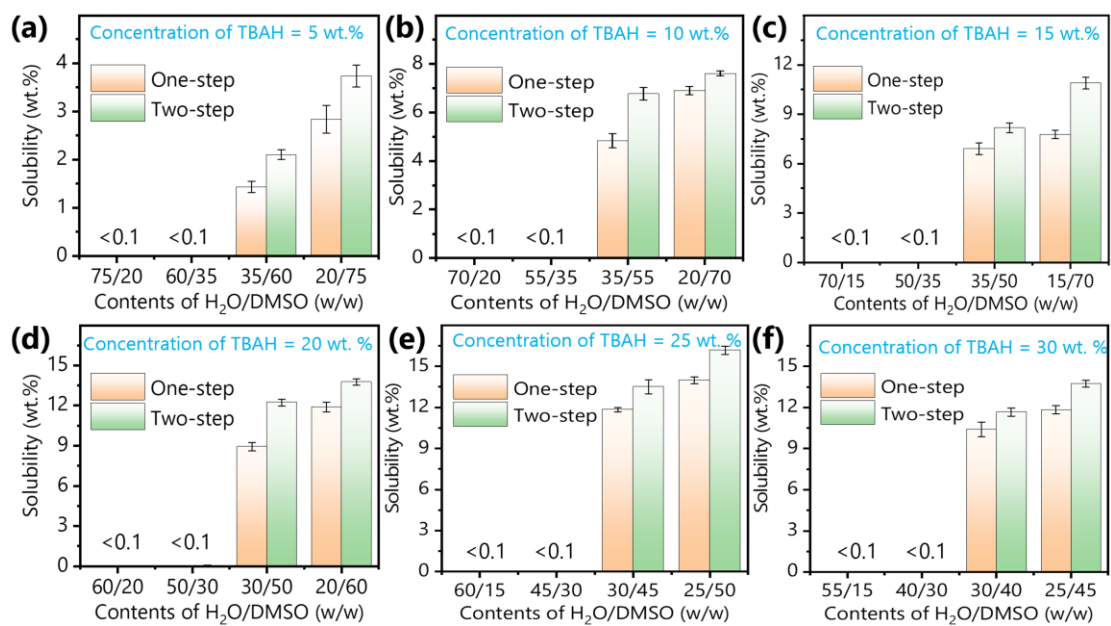

**Figure S7** Solubility of MCC in various TBAH/H<sub>2</sub>O/DMSO as the TBAH concentration and the contents of H<sub>2</sub>O/DMSO were tuned.

**Table S2** Detailed protocols for using TBAH/H<sub>2</sub>O/DMSO to dissolve cellulose (unit: wt.%).

| Solvents                                        | Formulation |                  |      | Solubility |          |
|-------------------------------------------------|-------------|------------------|------|------------|----------|
|                                                 | TBAH        | H <sub>2</sub> O | DMSO | One-step   | Two-step |
| B <sub>5</sub> H <sub>95</sub> S <sub>0</sub>   | 5           | 95               | 0    | 0          | 0        |
| B <sub>5</sub> H <sub>76</sub> S <sub>19</sub>  |             | 76               | 19   | 0          | 0        |
| B <sub>5</sub> H <sub>57</sub> S <sub>38</sub>  |             | 57               | 38   | 0          | 0        |
| B <sub>5</sub> H <sub>38</sub> S <sub>57</sub>  |             | 38               | 57   | 1.5        | 2.1      |
| B <sub>5</sub> H <sub>19</sub> S <sub>76</sub>  |             | 19               | 76   | 2.8        | 3.7      |
| B <sub>10</sub> H <sub>90</sub> S <sub>0</sub>  | 10          | 90               | 0    | 0          | 0        |
| B <sub>10</sub> H <sub>72</sub> S <sub>18</sub> |             | 72               | 18   | 0          | 0        |
| B <sub>10</sub> H <sub>54</sub> S <sub>36</sub> |             | 54               | 36   | 0          | 0        |
| B <sub>10</sub> H <sub>36</sub> S <sub>54</sub> |             | 36               | 54   | 4.8        | 6.8      |
| B <sub>10</sub> H <sub>18</sub> S <sub>72</sub> |             | 18               | 72   | 6.9        | 7.6      |
| B <sub>15</sub> H <sub>85</sub> S <sub>0</sub>  | 15          | 85               | 0    | 0          | 0        |
| B <sub>15</sub> H <sub>68</sub> S <sub>17</sub> |             | 68               | 17   | 0          | 0        |
| B <sub>15</sub> H <sub>51</sub> S <sub>34</sub> |             | 51               | 34   | 0          | 0        |
| B <sub>15</sub> H <sub>34</sub> S <sub>51</sub> |             | 34               | 51   | 6.9        | 8.2      |
| B <sub>15</sub> H <sub>17</sub> S <sub>68</sub> |             | 17               | 68   | 7.8        | 10.9     |
| B <sub>20</sub> H <sub>80</sub> S <sub>0</sub>  | 20          | 80               | 0    | 0          | 0        |
| B <sub>20</sub> H <sub>64</sub> S <sub>16</sub> |             | 64               | 16   | 0          | 0        |
| B <sub>20</sub> H <sub>48</sub> S <sub>32</sub> |             | 48               | 32   | 0          | 0        |
| B <sub>20</sub> H <sub>32</sub> S <sub>48</sub> |             | 32               | 48   | 8.9        | 12.2     |
| B <sub>20</sub> H <sub>16</sub> S <sub>64</sub> |             | 16               | 64   | 11.9       | 13.8     |
| B <sub>25</sub> H <sub>75</sub> S <sub>0</sub>  | 25          | 75               | 0    | 0          | 0        |
| B <sub>25</sub> H <sub>60</sub> S <sub>15</sub> |             | 60               | 15   | 0          | 0        |
| B <sub>25</sub> H <sub>45</sub> S <sub>30</sub> |             | 45               | 30   | 0          | 0        |
| B <sub>25</sub> H <sub>30</sub> S <sub>45</sub> |             | 30               | 45   | 11.8       | 13.5     |
| B <sub>25</sub> H <sub>15</sub> S <sub>60</sub> |             | 15               | 60   | 14.0       | 16.2     |
| B <sub>30</sub> H <sub>70</sub> S <sub>0</sub>  | 30          | 70               | 0    | 0          | 0        |
| B <sub>30</sub> H <sub>56</sub> S <sub>14</sub> |             | 56               | 14   | 0          | 0        |
| B <sub>30</sub> H <sub>42</sub> S <sub>28</sub> |             | 42               | 28   | 0          | 0        |
| B <sub>30</sub> H <sub>28</sub> S <sub>42</sub> |             | 28               | 42   | 10.4       | 11.7     |
| B <sub>30</sub> H <sub>14</sub> S <sub>56</sub> |             | 14               | 56   | 11.8       | 13.7     |

## 2.4 Dissolution of various cellulose in TBAH/H<sub>2</sub>O/DMSO solvent

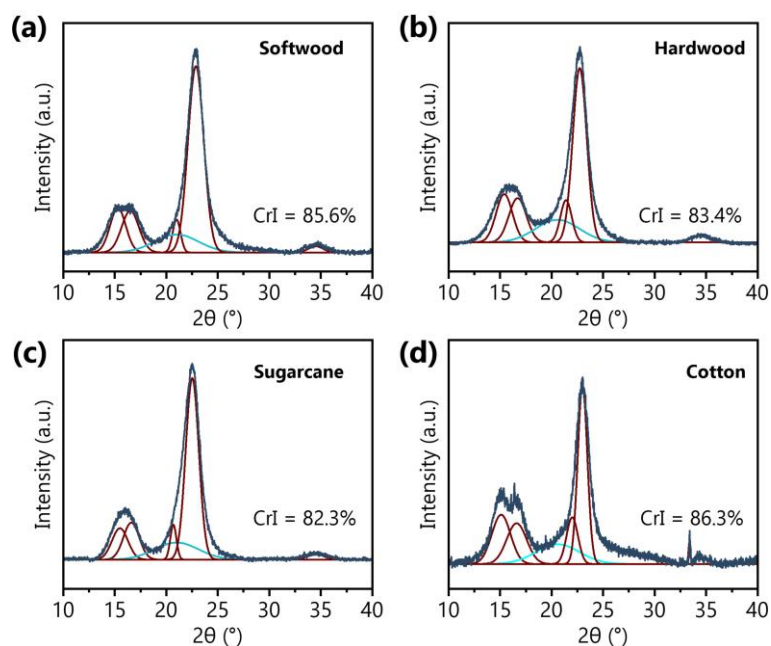

**Figure S8** XRD fitting patterns of various cellulose analyzed by Gaussian peak fitting. (a) Softwood pulp; (b) Hardwood pulp; (c) Sugarcane pulp; (d) Cotton pulp.

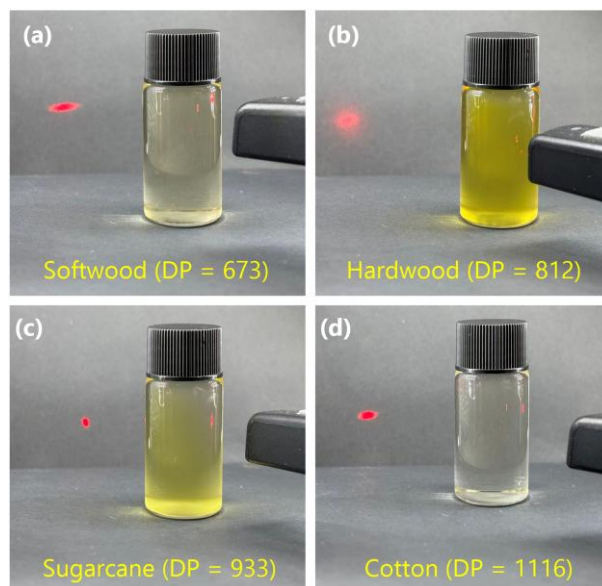

**Figure S9** Digital images of various cellulose solution with a concentration of 2 wt.% obtained by TBAH/H<sub>2</sub>O/DMSO dissolution. (a) Softwood pulp; (b) Hardwood pulp; (c) Sugarcane pulp; (d) Cotton pulp.

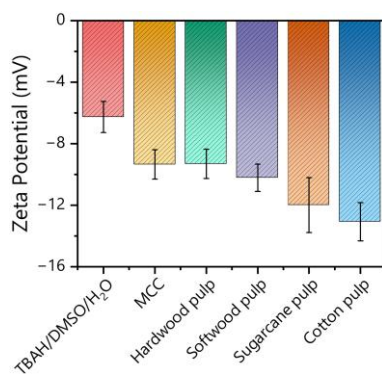

**Figure S10** Zeta potential of TBAH/H<sub>2</sub>O/DMSO solvent and various cellulose solution obtained by TBAH/H<sub>2</sub>O/DMSO dissolution.

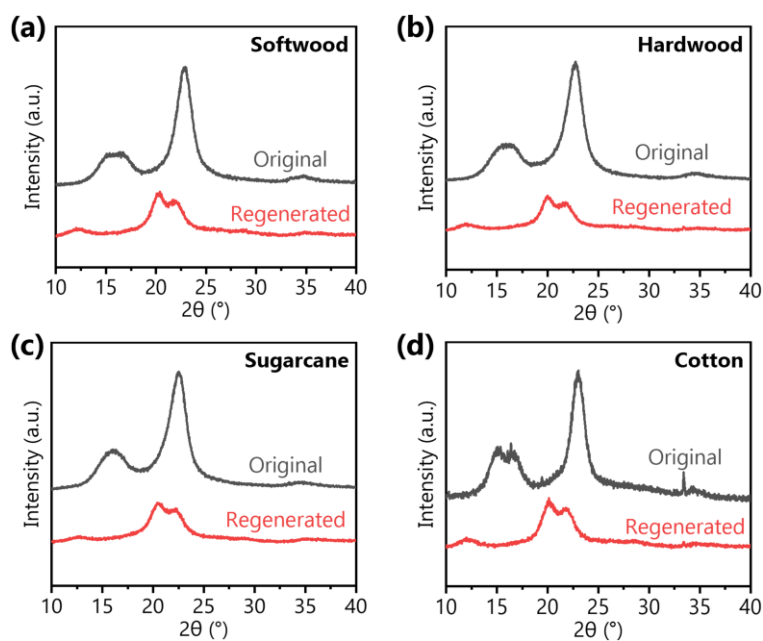

**Figure S11** XRD patterns of various cellulose and the corresponding regenerated cellulose. (a) Softwood pulp; (b) Hardwood pulp; (c) Sugarcane pulp; (d) Cotton pulp.

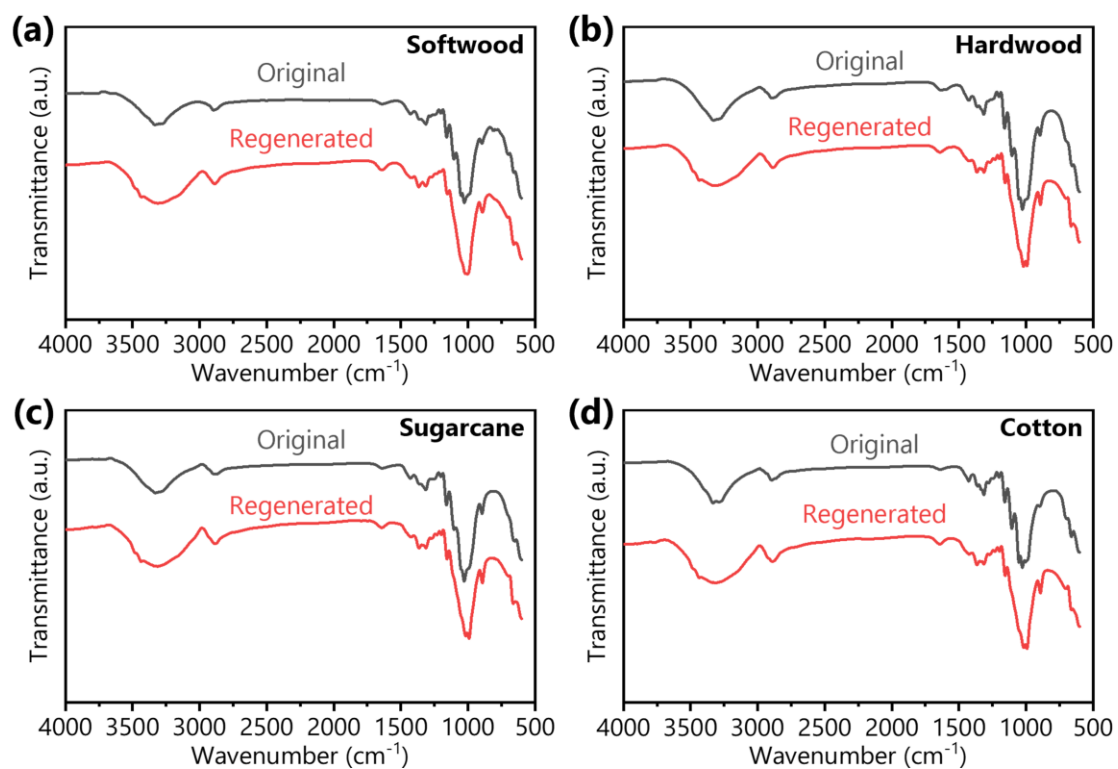

**Figure S12** FT-IR spectra of various cellulose and the corresponding regenerated cellulose. (a) Softwood pulp; (b) Hardwood pulp; (c) Sugarcane pulp; (d) Cotton pulp.

## 2.5 Comparison of TBAH/H<sub>2</sub>O/DMSO with conventional cellulose solvents

**Table S3** Comparison of dissolution performance of this work with conventional studies <sup>23–31</sup>.

| Solvent type                                            | Solvent temperature(°C) | Dissolution time | Solubility (wt.%) | Max DP     | Moisture sensitivity |
|---------------------------------------------------------|-------------------------|------------------|-------------------|------------|----------------------|
| NMMO                                                    | 90 – 120                | 10 – 60 min      | 8 – 20            | 800 – 1000 | High                 |
| DMAc/LiCl                                               | 80 – 120                | 24 h             | 3 – 8             | 1800       | High                 |
| [EMIM][OAc]                                             | 70 – 120                | 15 min           | 1 – 20            | 4000       | High                 |
| NaOH/H <sub>2</sub> O/urea                              | –12 – –10               | 5 min            | 7                 | 600        | Gentle               |
| ZnCl <sub>2</sub> ·H <sub>2</sub> O                     | R.T.                    | 60 min           | 1 – 5             | 500        | Moderate             |
| ZnCl <sub>2</sub> /AlCl <sub>3</sub> ·4H <sub>2</sub> O | R.T.                    | 15 – 120 min     | 1 – 10            | 4080       | Moderate             |
| ZnCl <sub>2</sub> /HCOOH/H <sub>2</sub> O               | R.T.                    | 1.5 h            | 9                 | 945        | Moderate             |
| Choline chloride: Imidazole                             | 110                     | 90 min           | 2.48              | 575        | Moderate             |
| Ca(SCN) <sub>2</sub> /H <sub>2</sub> O                  | 120 – 140               | 20 – 40 min      | 1 – 5             | 1600       | Gentle               |
| H <sub>2</sub> SO <sub>4</sub>                          | –10 – 0                 | 3 – 20 min       | 15 – 19           | 1230       | Gentle               |

**Table S4** Comparison of dissolution performance of this work with similar studies <sup>32–39</sup>.

| Solvent                                             | Solvent temperature (°C) | Dissolution time | Solubility (wt.%) | Max DP     | Moisture sensitivity |
|-----------------------------------------------------|--------------------------|------------------|-------------------|------------|----------------------|
| Tetrabutylammonium acetate/DMSO                     | R.T. – 40                | 2 min            | 8 – 15            | 1050       | High                 |
| Tetrabutylphosphonium hydroxide/H <sub>2</sub> O    | R.T.                     | 5 min            | 20                | n.r.       | Gentle               |
| Tetrabutylammonium fluoride/DMSO                    | R.T.                     | 15 min           | 2.5               | 650        | High                 |
| Tetraethylammonium hydroxide /H <sub>2</sub> O/urea | R.T.                     | 60 min           | 15                | 1800       | Gentle               |
| Tetraoctylphosphonium acetate/DMSO                  | R.T.                     | 10 – 20 min      | 8                 | 500 – 1000 | High                 |
| Methyltributylphosphonium acetate/DMSO              | 100 – 120                | 16 min           | 5 – 20            | n.r.       | High                 |
| Benzyltrimethylammonium hydroxide /H <sub>2</sub> O | 15 – 25                  | n.r.             | 3.1 – 6.8         | n.r.       | Gentle               |
| Tetrabutylammonium acetate/N,N-dimethylacetamide    | 60                       | n.r.             | 9                 | n.r.       | High                 |

Note: n.r., not reported.



### 3 Conductivity of various TBAH solution

#### 3.1 Conductivity of TBAH/DMSO solutions

**Table S5** Electrical conductivity of TBAH/DMSO solvents prepared via evaporating TBAH/H<sub>2</sub>O solution (Evap-H<sub>2</sub>O–TBAH/DMSO) and TBAH/methanol/DMSO solution (Evap-MeOH–TBAH/DMSO), respectively. All measurements were conducted at room temperature (25 °C).

|                         | Evap-H <sub>2</sub> O–TBAH/DMSO | Evap-MeOH–TBAH/DMSO |
|-------------------------|---------------------------------|---------------------|
| Conductivity<br>(mS/cm) | 0.63                            | 0.67                |

#### 3.2 Conductivity of TBAH aqueous solution

For TBAH aqueous solution, 25 wt.% of TBAH (namely, 1.01 mol/L) showed the maximum  $\kappa$  of 78.6 mS/cm. The  $\kappa$  of TBAH aqueous solution was regulated by ion number when TBAH concentration was lower than 20 wt.%, and high concentration of TBAH (beyond 25 wt.%) led to the reduction of  $\kappa$  due to the enhancement of interionic electrostatic interactions.

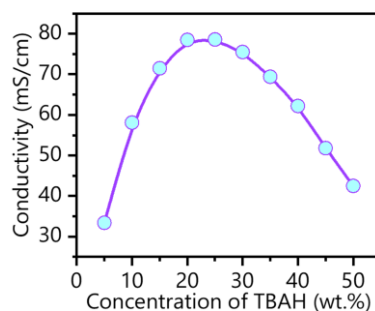

**Figure S13** Conductivity of TBAH aqueous solution with different TBAH concentration.

## 4. Characterization of the interaction among TBAH, H<sub>2</sub>O, DMSO, and cellulose

### 4.1 NMR spectra of cellobiose in different solvents

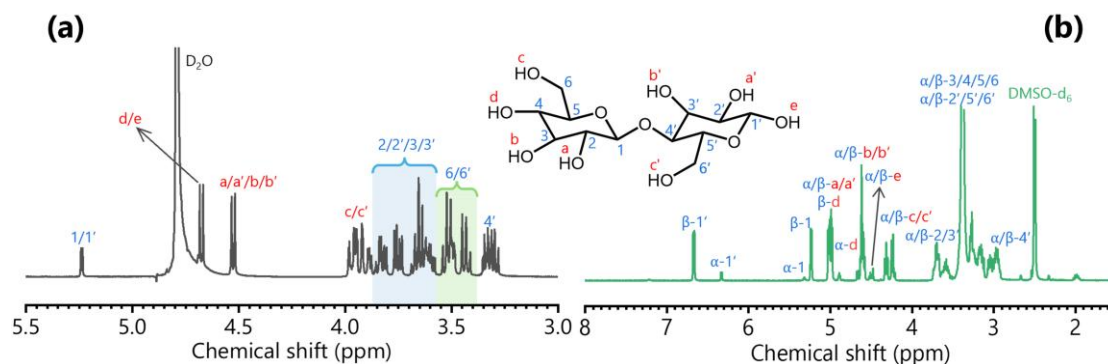

**Figure S14** <sup>1</sup>H NMR spectra of cellobiose in different solvents. (a) D<sub>2</sub>O; (b) DMSO-d<sub>6</sub>.

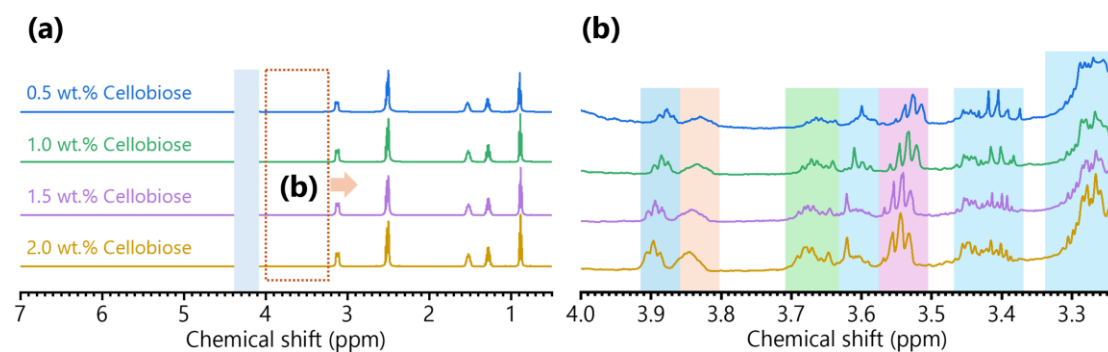

**Figure S15** Overall (left) and magnified (right) <sup>1</sup>H NMR spectra of cellobiose in TBAH/H<sub>2</sub>O/DMSO-d<sub>6</sub> by adjusting cellobiose concentration.

### 4.2 NMR spectra of cellulose in different solvents

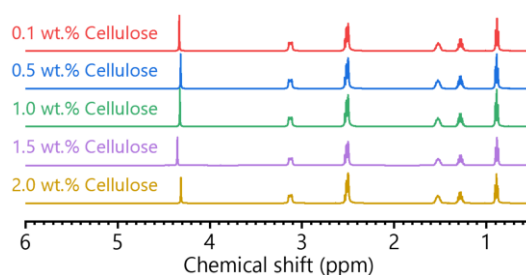

**Figure S16** <sup>1</sup>H NMR spectra of cellulose in TBAH/H<sub>2</sub>O/DMSO-d<sub>6</sub> by adjusting cellulose concentration.

## 5. Computer simulation of cellulose dissolved in TBAH/H<sub>2</sub>O/DMSO

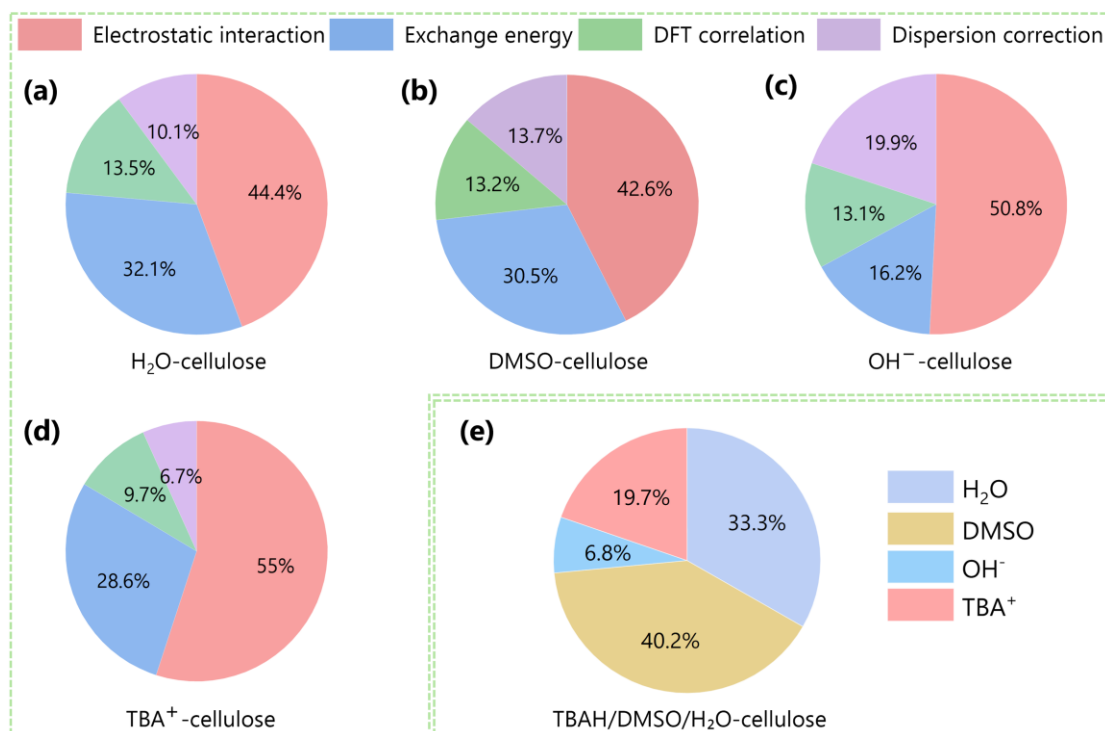

**Figure S17** sobEDA interaction analysis between cellulose and TBAH/DMSO/H<sub>2</sub>O solvent. (a-d) Fractional contributions of weak interactions (electrostatic interaction, exchange energy, DFT correlation, dispersion correction) between cellulose and H<sub>2</sub>O (a), DMSO (b), OH<sup>-</sup> (c), and TBA<sup>+</sup> (d), respectively; (e) Percentage contribution of H<sub>2</sub>O, DMSO, OH<sup>-</sup>, and TBA<sup>+</sup> to the total cellobiose-solvent interaction energy.

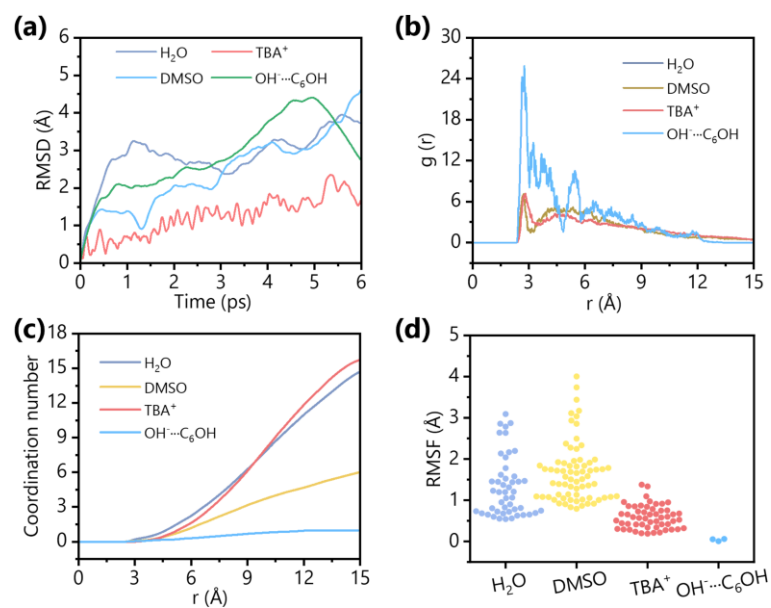

**Figure S18** Molecular dynamics of cellulose dissolved in TBAH/DMSO/H<sub>2</sub>O solvent. (a) RMSD curves of H<sub>2</sub>O, DMSO, TBA<sup>+</sup>, and OH<sup>-</sup>...C<sub>6</sub>OH; (b) RDF curves of H<sub>2</sub>O, DMSO, TBA<sup>+</sup>, and OH<sup>-</sup>...C<sub>6</sub>OH; (c) Coordination curves centered on H<sub>2</sub>O, DMSO, TBA<sup>+</sup>, and OH<sup>-</sup>...C<sub>6</sub>OH, respectively; (d) RMSF plots of H<sub>2</sub>O, DMSO, TBA<sup>+</sup>, and OH<sup>-</sup>...C<sub>6</sub>OH.

## 6. Fabrication and properties of the regenerated cellulose

### 6.1 Storage stability of cellulose solution

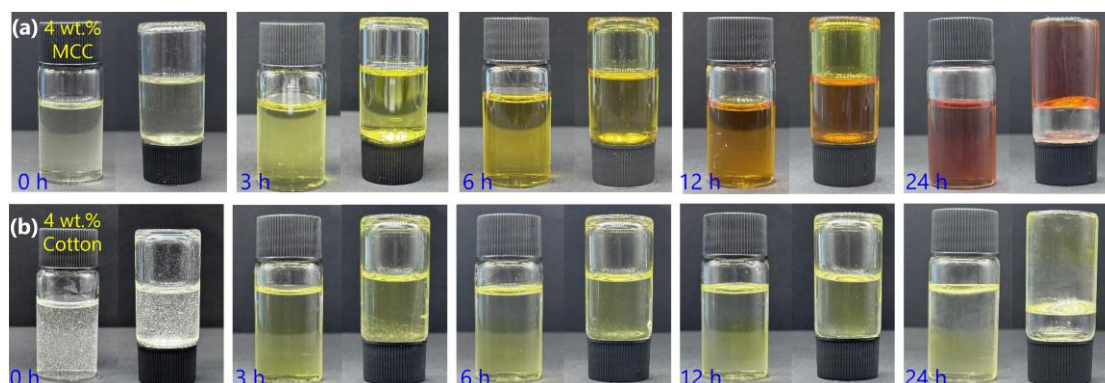

**Figure S19** Digital images of (a) 4 wt.% MCC solution and (b) 4 wt.% cotton pulp solution standing for different durations.

### 6.1 Thermal stability of the regenerated cellulose

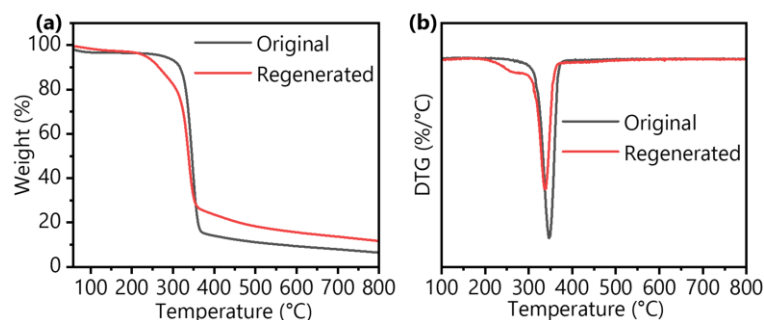

**Figure S20** Thermogravimetric (TG) curves (a) and derivative thermogravimetry (DTG) curves (b) of MCC and the corresponding regenerated cellulose.

Both MCC and the corresponding regenerated cellulose showed minor weight loss below 100 °C. The main degradation of MCC and the corresponding regenerated cellulose occurred at 280 ~ 380 °C. The regenerated cellulose exhibited slightly lower degradation temperatures than MCC, which attributed to the reduced crystallinity.

## 6.2 Mechanical performance of the regenerated cellulose

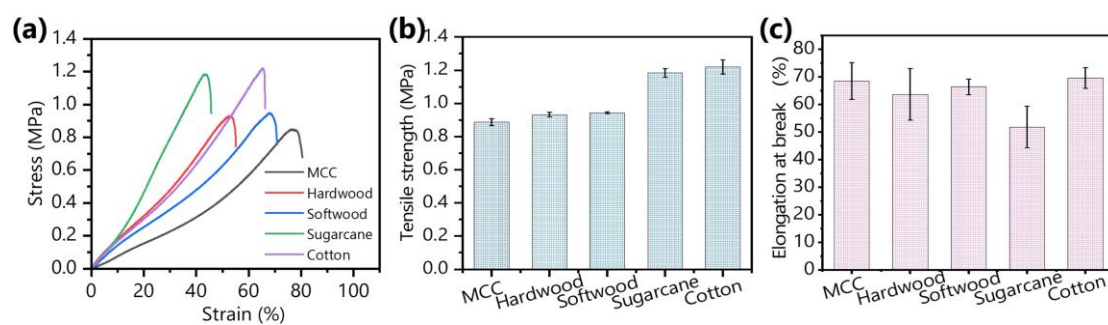

**Figure S21** Tensile properties of the regenerated cellulose hydrogels. (a) Stress–strain curves; (b) Tensile strength; (c) Elongation at break.

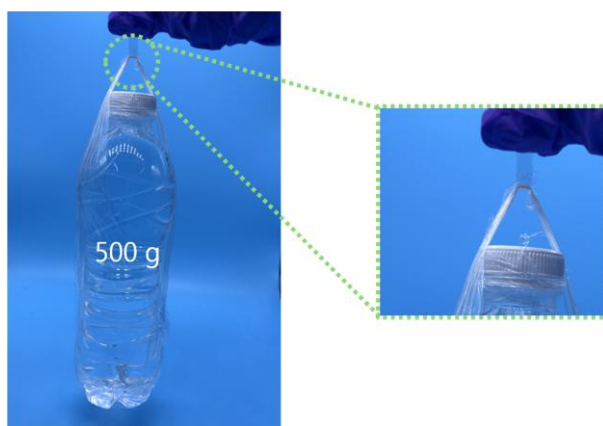

**Figure S22** A digital image illustrating a regenerated cellulose strip (width: 5 mm) that suspended a 500 mL water bottle filled with water.

## REFERENCES

- 1 H. Wang, B. Wang, S. Dong, Y. Yu, N. Wang and Z. Zhou, *Diam. Relat. Mater.*, 2024, **149**, 111623.
- 2 D. A. Dolan, D. A. Sherman, R. Atkin and G. G. Warr, *ChemPhysChem*, 2016, **17**, 3096–3101.
- 3 L. Zhang, H. Yu, S. Liu, Y. Wang, T. Mu and Z. Xue, *Ind. Eng. Chem. Res.*, 2023, **62**, 11723–11734.
- 4 M. J. Kamlet and R. W. Taft, *J. Am. Chem. Soc.*, 1976, **98**, 377–383.
- 5 A. D. Becke, *J. Chem. Phys.*, 1993, **98**, 5648–5652.
- 6 N. Barrios, J. G. Parra, P. Iza, R. A. Venditti and L. Pal, *J. Phys. Chem. A*, 2025, **129**, 5018–5033.
- 7 Z. Ju, Y. Yu, S. Feng, T. Lei, M. Zheng, L. Ding and M. Yu, *Materials*, 2022, **15**, 1158.
- 8 J. VandeVondele, M. Krack, F. Mohamed, M. Parrinello, T. Chassaing and J. Hutter, *Comput. Phys. Commun.*, 2005, **167**, 103–128.
- 9 T. Lu and Q. Chen, *Chemistry–Methods*, 2021, **1**, 231–239.
- 10 T. Lu and F. Chen, *J. Comput. Chem.*, 2012, **33**, 580–592.
- 11 Z. Tong, S. Zeng, H. Tang, W. Wang, Y. Sun, Q. Xia and H. Yu, *Green Chem.*, 2023, **25**, 5086–5096.
- 12 W. Humphrey, A. Dalke and K. Schulten, *J. Mol. Graph.*, 1996, **14**, 33–38.
- 13 T. D. Kühne, M. Iannuzzi, M. Del Ben, V. V. Rybkin, P. Seewald, F. Stein, T. Laino, R. Z. Khaliullin, O. Schütt, F. Schiffmann, D. Golze, J. Wilhelm, S. Chulkov, M. H. Bani-Hashemian, V. Weber, U. Borštnik, M. Taillefumier, A. S. Jakobovits, A. Lazzaro, H. Pabst, T. Müller, R. Schade, M. Guidon, S. Andermatt, N. Holmberg, G. K. Schenter, A. Hehn, A. Bussy, F. Belleflamme, G. Tabacchi, A. Glöß, M. Lass, I. Bethune, C. J. Mundy, C. Plessl, M. Watkins, J. VandeVondele, M. Krack and J. Hutter, *J. Chem. Phys.*, 2020, **152**, 194103.
- 14 J. VandeVondele and J. Hutter, *J. Chem. Phys.*, 2007, **127**, 114105.
- 15 J. VandeVondele and J. Hutter, *J. Chem. Phys.*, 2003, **118**, 4365–4369.
- 16 S. Goedecker, M. Teter and J. Hutter, *Phys. Rev. B*, 1996, **54**, 1703–1710.
- 17 S. Grimme, J. Antony, S. Ehrlich and H. Krieg, *J. Chem. Phys.*, 2010, **132**, 154104.
- 18 D. Van Der Spoel, E. Lindahl, B. Hess, G. Groenhof, A. E. Mark and H. J. C. Berendsen, *J. Comput. Chem.*, 2005, **26**, 1701–1718.

- 19 M. J. Abraham, T. Murtola, R. Schulz, S. Páll, J. C. Smith, B. Hess and E. Lindahl, *SoftwareX*, 2015, **1–2**, 19–25.
- 20 Z. Liu, X. Sun, M. Hao, C. Huang, Z. Xue and T. Mu, *Carbohydr. Polym.*, 2015, **117**, 99–105.
- 21 M. C. Jarvis, *Cellulose*, 2023, **30**, 667–687.
- 22 D. H. Brouwer and J. G. Mikolajewski, *Cellulose*, 2025, **32**, 4143–4160.
- 23 M. Akhlaghi Bagherjeri, H. Monhemi, A. N. M. A. Haque and M. Naebe, *Carbohydr. Polym.*, 2024, **323**, 121433.
- 24 Y.-Y. Ma, Z.-L. Lu, Y.-Z. Xing, W.-S. Zheng and C.-G. Liu, *Int. J. Biol. Macromol.*, 2024, **268**, 131729.
- 25 S. Rizvi and H. M. Gade, *Biomass Bioenergy*, 2025, **196**, 107758.
- 26 B. Xiong, P. Zhao, K. Hu, L. Zhang and G. Cheng, *Cellulose*, 2014, **21**, 1183–1192.
- 27 W. Ma, X. Li, L. Zhang, Y. Zheng, Y. Xi, J. Ma and Z. Wang, *Int. J. Biol. Macromol.*, 2024, **272**, 132912.
- 28 Y. Xi, L. Zhang, Y. Tian, J. Song, J. Ma and Z. Wang, *Green Chem.*, 2022, **24**, 885–897.
- 29 M. Hattori, T. Koga, Y. Shimaya and M. Saito, *Polym. J.*, 1998, **30**, 43–48.
- 30 J. Shuai, X. Gao, J. Zhao, W. Ge, M. Tian, Z. Lei and X. Wang, *Chem. Eng. J.*, 2024, **495**, 153280.
- 31 Z. Tong, S. Liu, H. Tang, J. Liu, W. Bi, Y. Liu, S. Zeng, Q. Xia, D. Zhao and H. Yu, *Nano Lett.*, 2025, **25**, 14489–14496.
- 32 L. Sun, J. Han, C. Tang, J. Wu, S. Fang, Y. Li, Y. Mao, L. Wang and Y. Wang, *Cellulose*, 2022, **29**, 8133–8150.
- 33 A. J. Holding, A. Parviainen, I. Kilpeläinen, A. Soto, A. W. T. King and H. Rodríguez, *RSC Adv.*, 2017, **7**, 17451–17461.
- 34 A. J. Holding, J. Xia, M. Hummel, H. Zwiers, M. Leskinen, D. Rico Del Cerro, S. Hietala, M. Nieger, M. Kemell, J. K. J. Helminen, V. Aseyev, H. Tenhu, I. Kilpeläinen and A. W. T. King, *ChemPhysChem*, 2022, **23**, e202100635.
- 35 J. Wu, Y. Zhong, H. Kang and R. Liu, *Carbohydr. Polym.*, 2025, **352**, 123167.
- 36 M. Akhlaq and M. Uroos, *J. Mol. Struct.*, 2025, **1327**, 141221.
- 37 R. Casarano, H. Nawaz, S. Possidonio, V. C. Da Silva and O. A. El Seoud, *Carbohydr. Polym.*, 2011, **86**, 1395–1402.
- 38 M. Kostag, K. Jedvert, C. Achtel, T. Heinze and O. A. El Seoud, *Molecules*, 2018,



**23**, 511.

- 39 J. A. Sirviö and J. P. Heiskanen, *Cellulose*, 2020, **27**, 1933–1950.
